# Supplementary material for: Stimuli-responsive hydrogel microcapsules for the amplified detection of microRNAs
Source: Royal Society of Chemistry journal article supplement (doi:10.1039/d1nr05170a), 2021-01-01
Supplement: d1nr05170a1.pdf [file d1nr05170a1.pdf]

## Supporting Information

# Stimuli-Responsive Hydrogel Microcapsules for the Amplified Detection of MicroRNAs

*Wen-Hsin Chang<sup>a</sup>, Yi-Fang Lee<sup>a</sup>, Yen-Wenn Liu<sup>a</sup>, Itamar Willner<sup>\*b</sup> and Wei-Ching Liao<sup>\*ac</sup>*

<sup>a</sup>Institute of Biochemistry and Molecular Biology, National Yang Ming Chiao Tung University,  
Taipei 112, Taiwan

<sup>b</sup>Institute of Chemistry, Center for Nanoscience and Nanotechnology, The Hebrew University of  
Jerusalem, Jerusalem 91904, Israel

<sup>c</sup>Center for Advanced Pharmaceuticals and Drug Delivery Research, National Yang Ming Chiao  
Tung University, Taipei 112, Taiwan

## Table of Contents

|                                                                                                                                     |   |
|-------------------------------------------------------------------------------------------------------------------------------------|---|
| <b>Table S1.</b> The nucleic acid sequences used in this study .....                                                                | 3 |
| <b>Fig. S1.</b> Determination of the ratio of acrylamide/acrydite-nucleic acids .....                                               | 4 |
| <b>Fig. S2.</b> Characterization of the microparticles by SEM and EDX analysis .....                                                | 5 |
| <b>Fig. S3.</b> Characterization of the DNA–acrylamide hydrogel microcapsules by SEM .....                                          | 6 |
| <b>Fig. S4.</b> Sequence design for isothermal strand displacement polymerization/nicking<br>amplification machinery (SDP/NA) ..... | 7 |
| <b>Fig. S5.</b> Characterization of the SDP/NA products by gel electrophoresis .....                                                | 8 |
| <b>Table S2.</b> Comparison of different amplification mechanisms based on oligonucleotide for<br>miRNA detection .....             | 9 |

**Table S1.** The nucleic acid sequences used in this study.

| No.         | Sequence (5'→3')                                                  |
|-------------|-------------------------------------------------------------------|
| 1           | /5AmMC6/ TTTTTTAGCTGATAACACTG                                     |
| 2           | /5Acryd/TTTTTTTTTAACACTGtCCATCTTTACCAGACAGTGTTATCAGC<br>T         |
| 3           | /5Acryd/ TGCTCTAGATCTGGTTG                                        |
| 4           | AAGATGGACAGTGAGCTGATAACACTGTCAACCAGATCTAGAGC                      |
| miR-141     | UAACACUGUCUGGUAAGAUGG                                             |
| miR-200a    | UAACACUGUCUGGUAACGAUGU                                            |
| miR-200b    | UAAUACUGCCUGGUAAGAUGA                                             |
| miR-21      | UAGCUUAUCAGACUGAUGUUGA                                            |
| <i>rfbE</i> | GGCCAAGGATTAGCTGTACAT                                             |
| HP          | TCCACTCTCGACCTGTCCATCTTTACCAGACAGTGTTATCAGCTGAGG<br>TCGAGAGTGGCTT |
| ASHP        | GAGAGTGCCACTCTCGACC                                               |

\*MiR-200a, miR-200b, and miR-21 were used in the sequence selectivity tests. Underline indicates the nucleotides which are different from miR-141.

## Determination of the Ratio of Acrylamide/Acrydite-Nucleic Acids

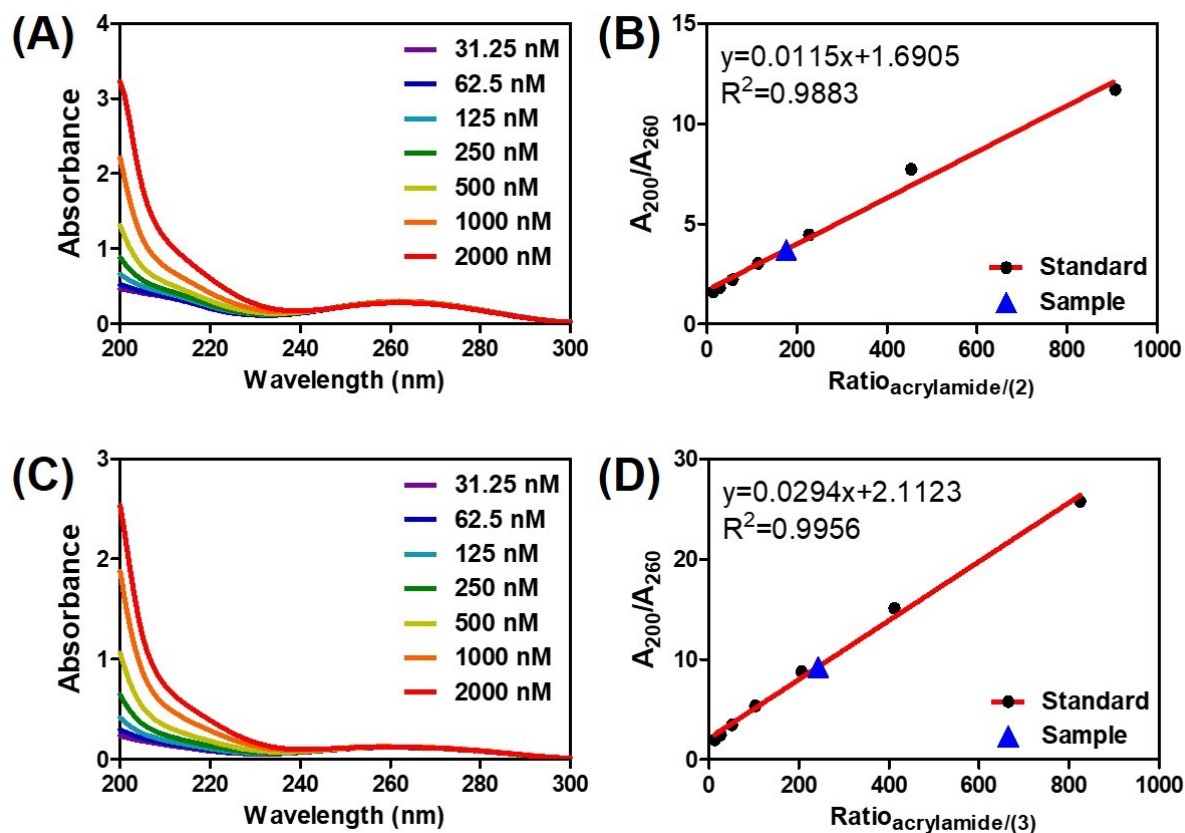

**Figure S1.** (A) Absorbance spectra of a fixed 5  $\mu\text{M}$  nucleic acid (2) with different concentrations of acrylamides. (B) Calibration curve from absorbance ratio of acrylamide (150 kDa, *ca.* 2110 monomers) to nucleic acid ( $A_{200}/A_{260}$ ) under different ratios of acrylamide/nucleic acid (2). The ratio of acrylamide units to nucleic acid (2) was determined spectroscopically to be 176. (C) Absorbance spectra of a fixed 5  $\mu\text{M}$  nucleic acid (3) with different concentrations of acrylamides. (D) Calibration curve from absorbance ratio of acrylamide (150 kDa, *ca.* 2110 monomers) to nucleic acid ( $A_{200}/A_{260}$ ) under different ratios of acrylamide/nucleic acid (3). The ratio of acrylamide units to nucleic acid (3) was determined spectroscopically to be 243.

## Characterization of the Microparticles by SEM and EDX Analysis

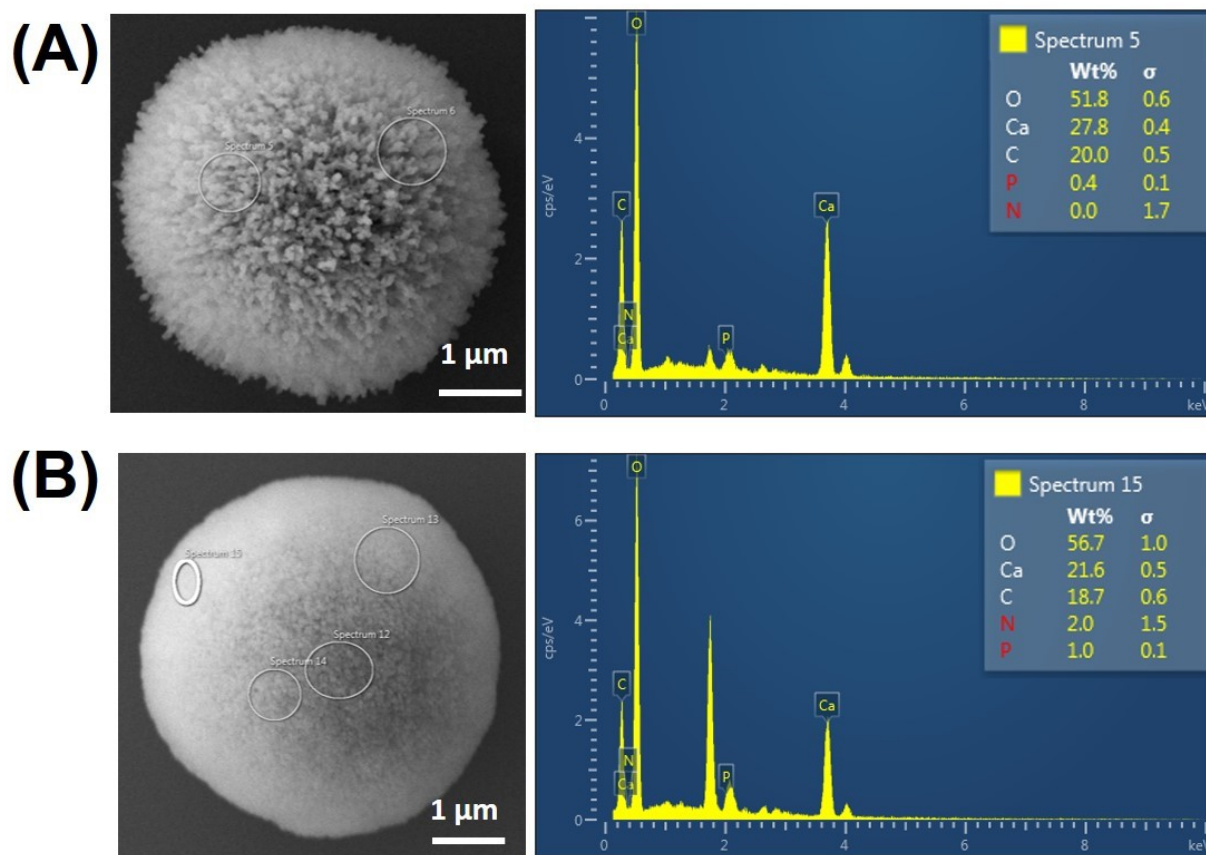

**Figure S2.** SEM images and EDX results of uncoated  $\text{CaCO}_3$  microparticles (A) and DNA–acrylamide hydrogel-coated  $\text{CaCO}_3$  microparticles (B). Scale bars: 1  $\mu\text{m}$ . The EDX results shown higher N and P percentages on DNA–acrylamide hydrogel coated  $\text{CaCO}_3$  microparticles indicates the modification of DNA hydrogel on particles surface.

### Characterization of the DNA–Acrylamide Hydrogel Microcapsules by SEM

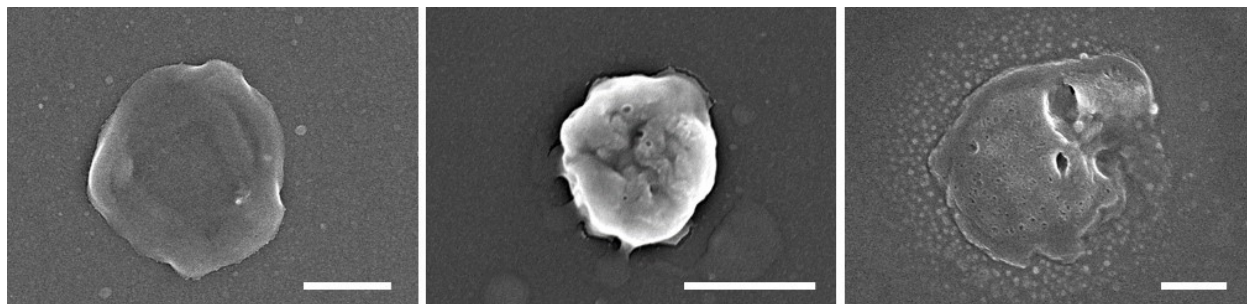

Figure S3. Representative SEM images of DNA–acrylamide hydrogel microcapsules after the etching of the CaCO<sub>3</sub> core. Scale bar: 1  $\mu$ m.

## Sequences Design for Isothermal Strand Displacement Polymerization/Nicking

### Amplification Machinery (SDP/NA)

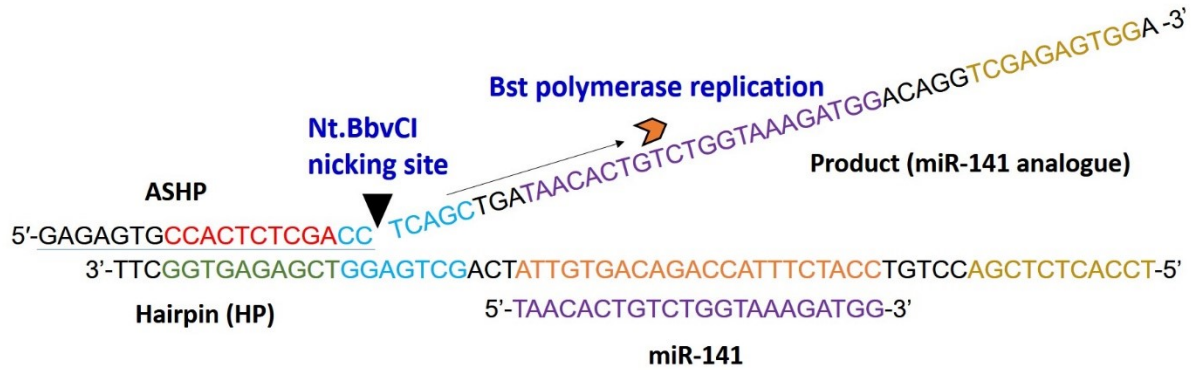

**Figure S4.** Schematic representation of the sequence replicated by the *Bst* polymerase and the nicking site of the Nt.BbvCI nicking endonuclease involved in the isothermal strand displacement polymerization/nicking amplification machinery (SDP/NA). The sequence with underline represents an auxiliary hairpin DNA strand (ASHP), it can bind to the open hairpin (HP) and acts as a primer for polymerase replication. The symbol (▼) indicates Nt.BbvCI nicking site. MiR-141 analogue is the product of strand-displacement amplification.

## Characterization of the SDP/NA Products by Gel Electrophoresis

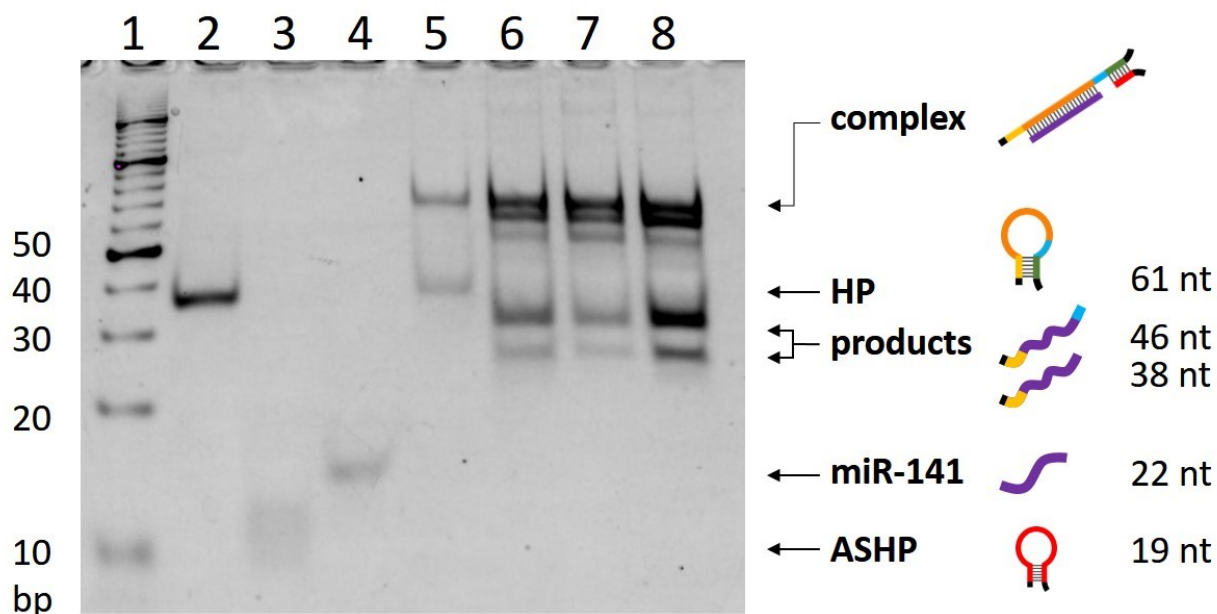

**Figure S5.** Native polyacrylamide gel electrophoresis image corresponding to isothermal strand displacement polymerization/nicking amplification machinery (SDP/NA) products. Lane 1: DNA marker; Lane 2: hairpin DNA (HP); Lane 3: auxiliary hairpin DNA strand (ASHP); Lane 4: mir-141; Lane 5: SDP/NA reaction 15 min without miR-141; Lane 6: SDP/NA reaction 15 min with 50 nM miR-141; Lane 7: SDP/NA reaction 30 min without miR-141; Lane 8: SDP/NA reaction 30 min with 50 nM miR-141. 12 % of native polyacrylamide gel.

**Table S2.** Comparison of different amplification mechanisms based on oligonucleotide for miRNA detection.

| Target            | Method       | Amplification mechanism                                                                | Detection limit                     | Linear range                                 | Assay time | Remarks                                                                                                                                               | Ref.       |
|-------------------|--------------|----------------------------------------------------------------------------------------|-------------------------------------|----------------------------------------------|------------|-------------------------------------------------------------------------------------------------------------------------------------------------------|------------|
| miR-21<br>miR-141 | Fluorescence | DNA polymerase/NEase-assisted signal amplification                                     | 9.8 pM (miR-21)<br>6.1 pM (miR-141) | $2 \times 10^{-11}$ to $5 \times 10^{-10}$ M | 22 h       | Integration with silver nanoclusters (AgNCs) for simultaneously detecting dual targets; study in spiked serum samples.                                | 1          |
| miR-21            | Fluorescence | Strand displacement reaction                                                           | 4.4 pM                              | $10^{-12}$ to $2 \times 10^{-10}$ M          | 6 h        | Integration with dye-loaded poly(ethylmethacrylate)-based polymer nanoparticles; cell lysate study.                                                   | 2          |
| miR-20a           | Fluorescence | Catalytic hairpin assembly (CHA) reaction                                              | 0.491 pM                            | $5 \times 10^{-13}$ to $2 \times 10^{-10}$ M | 5 h        | Integration with Fe <sub>3</sub> O <sub>4</sub> nanoparticles cross-linked carbon (Fe <sub>3</sub> O <sub>4</sub> @C); study in cell culture samples. | 3          |
| miR-141           | Fluorescence | Duplex-specific nuclease (DSN) and telomerase amplification                            | 0.28 pM                             | $10^{-12}$ to $10^{-7}$ M                    | 5 h        | Integration with CdSe/ZnS quantum dots (QDs); serum sample study. However, 55°C heating process is needed.                                            | 4          |
| miR-203           | Fluorescence | DNA chain displacement recycle (CDR) reaction                                          | 10 pM                               | $10^{-11}$ to $10^{-7}$ M                    | 1.5-2 h    | Integration with gold nanoparticles (AuNPs); study in cell culture samples.                                                                           | 5          |
| miR-141           | Fluorescence | Duplex-specific nuclease (DSN) amplification                                           | 0.42 pM                             | $5 \times 10^{-12}$ to $5 \times 10^{-9}$ M  | 90 min     | Integration with magnetic nanoparticles coated with poly-dopamine (MNPs@PDA); cell lysate study. However, 50°C heating process is needed.             | 6          |
| miR-21            | Fluorescence | $\lambda$ exonuclease amplification                                                    | 20 pM                               | $2 \times 10^{-11}$ to $5 \times 10^{-9}$ M  | 70 min     | Integration with graphene oxide (GO); spiked biological fluids and cell lysate study.                                                                 | 7          |
| miR-141           | Fluorescence | Isothermal strand displacement polymerization/nicking amplification machinery (SDP/NA) | 44.9 pM                             | $10^{-10}$ to $10^{-7}$ M                    | 90 min     | Integration with CdSe/ZnS quantum dots-loaded DNA hydrogel microcapsules; study in spiked serum samples; potential control-released drug carriers.    | This study |

\*It should be noted that the present sensing platform reveals comparable sensitivity to other optical (fluorescence) assays for the detection of miRNA. Several advantages of the present method might include faster detection time-intervals and lack of susceptibility to environmental interferences that might accompany the same of the nanomaterial optical transducers (*e.g.* AgNCs, AuNPs or graphene oxide), such as thiols or dopamine. All sensing platforms, including ours, however, are far below the sensitivity demonstrated by the commercially available methods. Nonetheless, the progress and advances to improve the sensitivity of non-PCR sensing platforms by biocatalytic and DNA-machinery (and adaptation of highly-sensitive DNA machinery<sup>8</sup> and DNA biocatalytic circuitries for miRNA-sensing) are promising pathways to follow. Particularly, faster analytical procedures and the lack of auxiliary instruments demonstrated by these alternative methods could provide effective means for point-of-care detection and field-test analyses of miRNAs.

## References

1. Li, M.; Xu, X.; Cai, Q. DNA Polymerase/NEase-Assisted Signal Amplification Coupled with Silver Nanoclusters for Simultaneous Detection of Multiple MicroRNAs and Molecular Logic Operations. *Sensors Actuators B: Chem.* **2021**, 327, 128915.
2. Egloff, S.; Melnychuk, N.; Reisch, A.; Martin, S.; Klymchenko, A. S. Enzyme-Free Amplified Detection of Cellular MicroRNA by Light-Harvesting Fluorescent Nanoparticle probes. *Biosens. Bioelectron.* **2021**, 179, 113084.
3. Fan, Y.; Liu, Y.; Zhou, Q.; Du, H.; Zhao, X.; Ye, F.; Zhao, H. Catalytic Hairpin Assembly Indirectly Covalent on Fe<sub>3</sub>O<sub>4</sub>@C Nanoparticles with Signal Amplification for Intracellular Detection of miRNA. *Talanta* **2021**, 223, 121675.
4. Jou, A. F.-j.; Lu, C.-H.; Ou, Y.-C.; Wang, S.-S.; Hsu, S.-L.; Willner, I.; Ho, J.-a. A. Diagnosing the MiR-141 Prostate Cancer Biomarker Using Nucleic Acid-Functionalized CdSe/ZnS QDs and Telomerase. *Chemical Science* **2015**, 6, 659–665.
5. Zhang, J.; Zhang, H.; Ye, S.; Wang, X.; Ma, L. Fluorescent-Raman Binary Star Ratio Probe for MicroRNA Detection and Imaging in Living Cells. *Anal. Chem.* **2021**, 93, 1466-1471.
6. Sun, Y.; Wang, C.; Tang, L.; Zhang, Y.; Zhang, G.-J. Magnetic-Enhanced Fluorescence Sensing of Tumor MiRNA by Combination of MNPs@PDA with Duplex Specific Nuclease. *RSC Advances* **2021**, 11, 2968–2975.
7. Ai, X.; Zhao, H.; Hu, T.; Yan, Y.; He, H.; Ma, C. A Signal-On Fluorescence-Based Strategy for Detection of MicroRNA-21 Based on Graphene Oxide And  $\lambda$  Exonuclease-Based Signal Amplification. *Anal. Methods* **2021**, 13, 2107–2113.
8. Wang, F.; Liu, X.; Willner, I. DNA Switches: From Principles to Applications. *Angew. Chem. Int. Ed.* **2015**, 54, 1098–1129.
